# Supplementary material
Source: Springer Nature journal article supplement (https://www.springermedizin.de/resource/supplementary/13075_2011_3163_MOESM8_ESM.pdf/9693882)

**A**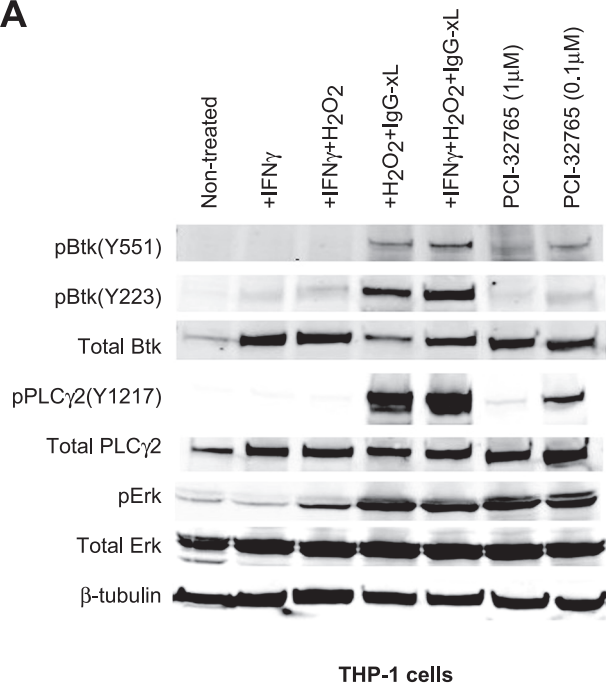**B**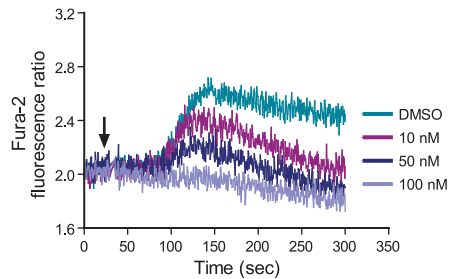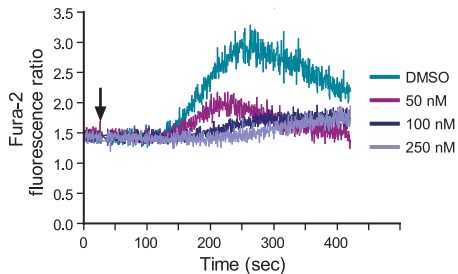

Supplement: MOESM8 [file 9693882]
